# Supplementary material
Source: PubMed Central journal article supplement (PMC4478798)
Supplement: supp_fj.14-264010_Supplemental_Figure1.pdf [file supp_fj.14-264010_Supplemental_Figure1.pdf]

Supplemental Figure 1

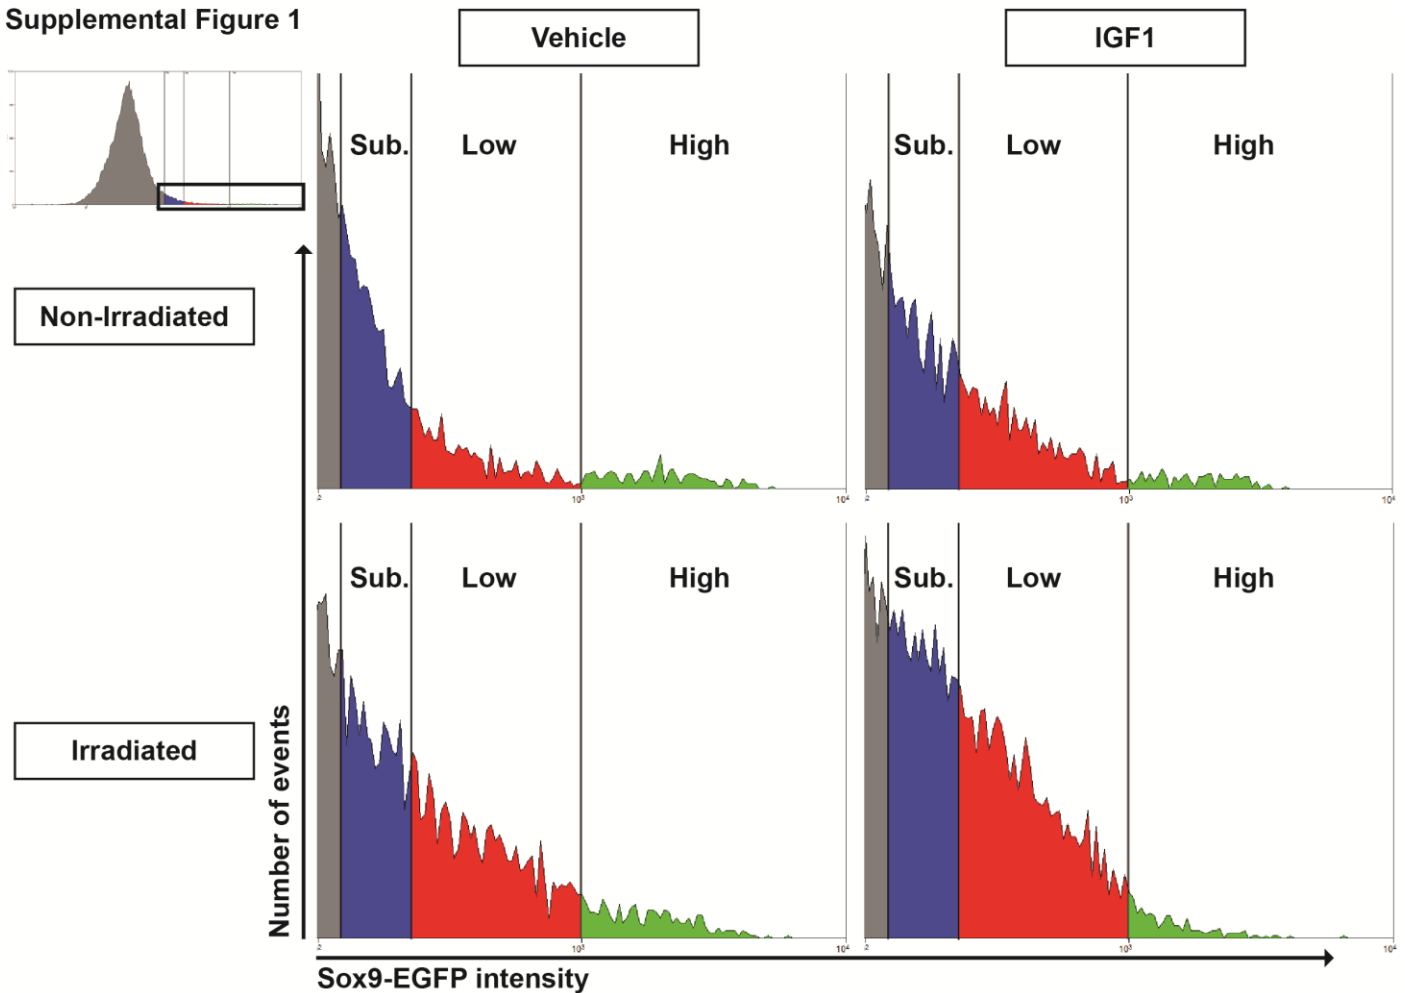

**Supplemental Figure 1: IGF1 induces Sox9-EGFP<sup>Low</sup> cell expansion in control mice and at 5 days post-radiation.** Representative flow cytometry histograms of single IEC preparations from each treatment groups (non-irradiated/vehicle, non-irradiated/IGF1, irradiated/vehicle, irradiated/IGF1) show that in both non-irradiated mice and during crypt regeneration, IGF1 increases the proportion of Sox9-EGFP<sup>Low</sup> cells (**Red**) but does not have any significant effect on Sox9-EGFP<sup>High</sup> cells (**Green**) or Sox9-EGFP<sup>Sublow</sup> progenitors (**Blue**). One animal from each of the four treatment groups was analyzed in each flow cytometry run and the gates were set on the non-irradiated vehicle-treated mouse studied in that same run (n=4 per group).
