# Supplementary material
Source: PubMed Central journal article supplement (PMC4478798)
Supplement: supp_fj.14-264010_Supplemental_Table1.pdf [file supp_fj.14-264010_Supplemental_Table1.pdf]

## Supplemental Table 1

| Key Genes                                                                                                  |            |              |            |          |
|------------------------------------------------------------------------------------------------------------|------------|--------------|------------|----------|
| GeneName                                                                                                   | GeneSymbol | EntrezGeneID | regulation | p-value  |
| <b>Key genes selectively regulated in Sox9-EGFP<sup>Low</sup> cells in uninjured intestine by IGF1</b>     |            |              |            |          |
| inhibitor of growth family, member 3                                                                       | Ing3       | 71777        | down       | 1.22E-02 |
| junction-mediating and regulatory protein                                                                  | Jmy        | 57748        | down       | 1.50E-02 |
| DNA-damage regulated autophagy modulator 1                                                                 | Dram1      | 71712        | down       | 4.71E-02 |
| ataxia telangiectasia mutated homolog (human)                                                              | Atm        | 11920        | down       | 4.93E-02 |
| ephrin B3                                                                                                  | Efnb3      | 13643        | down       | 3.46E-02 |
| Indian hedgehog                                                                                            | lhh        | 16147        | up         | 1.28E-02 |
| frizzled homolog 10 (Drosophila)                                                                           | Fzd10      | 93897        | down       | 2.40E-02 |
| MAD homolog 4 (Drosophila)                                                                                 | Smad4      | 17128        | down       | 1.55E-02 |
| bone morphogenic protein receptor, type II (serine/threonine kinase)                                       | Bmpr2      | 12168        | down       | 2.16E-02 |
| <b>Key genes selectively regulated in Sox9-EGFP<sup>High</sup> cells in uninjured intestine by IGF1</b>    |            |              |            |          |
| RAD21 homolog (S. pombe)                                                                                   | Rad21      | 19357        | up         | 4.44E-02 |
| ATP synthase, H+ transporting, mitochondrial F0 complex, subunit F                                         | Atp5j      | 11957        | down       | 4.80E-02 |
| ATP synthase, H+ transporting, mitochondrial F0 complex, subunit F2                                        | Atp5j2     | 57423        | down       | 1.76E-02 |
| ATPase, H+ transporting, lysosomal V0 subunit D2                                                           | Atp6v0d2   | 242341       | down       | 8.62E-03 |
| cytochrome c oxidase subunit IV isoform 2                                                                  | Cox4i2     | 84682        | down       | 7.90E-03 |
| cytochrome c oxidase, subunit VIb polypeptide 1                                                            | Cox6b1     | 110323       | down       | 2.91E-02 |
| cytochrome c oxidase, subunit VIIa 1                                                                       | Cox7a1     | 12865        | down       | 1.45E-03 |
| cytochrome c oxidase, subunit VIIa 2                                                                       | Cox7a2     | 12866        | down       | 1.38E-02 |
| cytochrome c oxidase subunit VIIb                                                                          | Cox7b      | 66142        | down       | 3.72E-02 |
| cytochrome c oxidase, subunit VIIa                                                                         | Cox8a      | 12868        | down       | 4.28E-02 |
| cytochrome c oxidase, subunit VIIb                                                                         | Cox8b      | 12869        | up         | 3.81E-02 |
| NADH dehydrogenase subunit 3                                                                               | ND3        | 17718        | down       | 1.74E-02 |
| NADH dehydrogenase (ubiquinone) 1 alpha subcomplex, 12                                                     | Ndufa12    | 66414        | down       | 2.17E-02 |
| NADH dehydrogenase (ubiquinone) 1 alpha subcomplex, 2                                                      | Ndufa2     | 17991        | down       | 1.18E-02 |
| NADH dehydrogenase (ubiquinone) 1 alpha subcomplex, 5                                                      | Ndufa5     | 68202        | down       | 5.75E-03 |
| NADH dehydrogenase (ubiquinone) 1, alpha/beta subcomplex, 1                                                | Ndufab1    | 70316        | down       | 2.12E-02 |
| NADH dehydrogenase (ubiquinone) 1 beta subcomplex 3                                                        | Ndufb3     | 66495        | down       | 1.31E-02 |
| NADH dehydrogenase (ubiquinone) 1 beta subcomplex, 9                                                       | Ndufb9     | 66218        | down       | 4.25E-02 |
| NADH dehydrogenase (ubiquinone) Fe-S protein 4                                                             | Ndufs4     | 17993        | down       | 1.85E-02 |
| ubiquinol-cytochrome c reductase, complex III subunit X                                                    | Uqcr10     | 66152        | down       | 2.45E-02 |
| ubiquinol-cytochrome c reductase binding protein                                                           | Uqcrb      | 67530        | down       | 3.94E-03 |
| ubiquinol-cytochrome c reductase hinge protein                                                             | Uqcrh      | 66576        | down       | 2.78E-02 |
| <b>Key genes selectively regulated in Sox9-EGFP<sup>Low</sup> cells in regenerating intestine by IGF1</b>  |            |              |            |          |
| family with sequence similarity 175, member A                                                              | Fam175a    | 70681        | down       | 4.16E-02 |
| meiotic recombination 11 homolog A (S. cerevisiae)                                                         | Mre11a     | 17535        | down       | 3.47E-02 |
| E2F transcription factor 6                                                                                 | E2f6       | 50496        | down       | 3.87E-02 |
| retinoblastoma-like 2                                                                                      | Rbl2       | 19651        | up         | 2.44E-02 |
| SWI/SNF related, matrix associated, actin dependent regulator of chromatin, subfamily d, member 2          | Smarcd2    | 83796        | up         | 4.51E-02 |
| SWI/SNF related, matrix associated, actin dependent regulator of chromatin, subfamily d, member 3          | Smarcd3    | 66993        | up         | 1.36E-02 |
| Kruppel-like factor 5                                                                                      | Klf5       | 12224        | up         | 3.22E-04 |
| BCL2-associated athanogene 5                                                                               | Bag5       | 70369        | down       | 2.03E-02 |
| baculoviral IAP repeat-containing 3                                                                        | Birc3      | 11796        | up         | 1.14E-02 |
| <b>Key genes selectively regulated in Sox9-EGFP<sup>High</sup> cells in regenerating intestine by IGF1</b> |            |              |            |          |
| ATP synthase, H+ transporting, mitochondrial F0 complex, subunit F2                                        | Atp5j2     | 57423        | down       | 2.67E-02 |
| ATPase, H+ transporting, lysosomal V1 subunit E2                                                           | Atp6v1e2   | 74915        | down       | 3.92E-02 |
| ATPase, H+ transporting, lysosomal V1 subunit G2                                                           | Atp6v1g2   | 66237        | up         | 2.26E-02 |
| ubiquinol-cytochrome c reductase, complex III subunit VII                                                  | Uqcrq      | 22272        | down       | 2.55E-02 |
| hemopoietic cell kinase                                                                                    | Hck        | 15162        | up         | 3.06E-02 |
| snail homolog 2 (Drosophila)                                                                               | Snai2      | 20583        | up         | 6.23E-03 |
| Spi-B transcription factor (Spi-1/PU.1 related)                                                            | Spib       | 272382       | up         | 3.28E-02 |

**Supplemental Table 1: Key genes regulated by IGF1 exclusively in Sox9-EGFP<sup>Low</sup> or Sox9-EGFP<sup>High</sup> cell populations in uninjured or regenerating intestines.** Selected genes significantly and selectively regulated by IGF1 in Sox9-EGFP<sup>Low</sup> or Sox9-EGFP<sup>High</sup> cell population isolated from uninjured small intestine or at day 5 post-radiation.
