# Supplementary material
Source: PubMed Central journal article supplement (PMC4478798)
Supplement: supp_fj.14-264010_Supplemental_Table2.pdf [file supp_fj.14-264010_Supplemental_Table2.pdf]

**Supplemental Table 2**

| <b>Key Pathways</b>                                                                                                             |                |
|---------------------------------------------------------------------------------------------------------------------------------|----------------|
| <i>Pathway name</i>                                                                                                             | <i>p-value</i> |
| <b>Pathways associated with genes selectively regulated in Sox9-EGFP<sup>Low</sup> cells in uninjured intestine by IGF1</b>     |                |
| Digestive System Development and Function                                                                                       | 3.83E-03       |
| Mouse Embryonic Stem Cell Pluripotency                                                                                          | 5.22E-04       |
| p53 signaling                                                                                                                   | 1.61E-02       |
| <b>Pathways associated with genes selectively regulated in Sox9-EGFP<sup>High</sup> cells in uninjured intestine by IGF1</b>    |                |
| Cell Death                                                                                                                      | 6.53E-06       |
| Cellular Growth and Proliferation                                                                                               | 1.60E-06       |
| Oxidative Phosphorylation                                                                                                       | 6.73E-03       |
| Cytochrome P450 Panel                                                                                                           | 4.59E-03       |
| <b>Pathways associated with genes selectively regulated in Sox9-EGFP<sup>Low</sup> cells in regenerating intestine by IGF1</b>  |                |
| DNA Replication, Recombination and Repair                                                                                       | 1.44E-03       |
| Role of BRCA1 in DNA Damage Response                                                                                            | 1.04E-02       |
| Assembly of RNA Polymerase I Complex                                                                                            | 1.59E-02       |
| Cleavage and Polyadenylation of Pre-mRNA                                                                                        | 2.78E-02       |
| Anti-Apoptosis                                                                                                                  | 2.34E-02       |
| <b>Pathways associated with genes selectively regulated in Sox9-EGFP<sup>High</sup> cells in regenerating intestine by IGF1</b> |                |
| Tissue Development                                                                                                              | 2.55E-03       |
| Oxidative Phosphorylation                                                                                                       | 4.86E-02       |

**Supplemental Table 2: Key pathways associated with genes regulated by IGF1 exclusively in Sox9-EGFP<sup>Low</sup> or Sox9-EGFP<sup>High</sup> cell populations in uninjured or regenerating intestines.** Selected pathways identified by Ingenuity Pathway Analysis (IPA) as significantly associated with genes regulated by IGF1 in Sox9-EGFP<sup>Low</sup> or Sox9-EGFP<sup>High</sup> cell population isolated from uninjured small intestine or at day 5 post-radiation.
